# Supplementary material for: Plasma miR-203a-3p as a Novel Predictor of Dementia in Patients with Parkinson’s Disease
Source: MDPI journal article supplement (doi:10.3390/ijms25063554), 2024-03-21
Supplement: s1 [file s1]

Supplementary Materials

Figure S1.

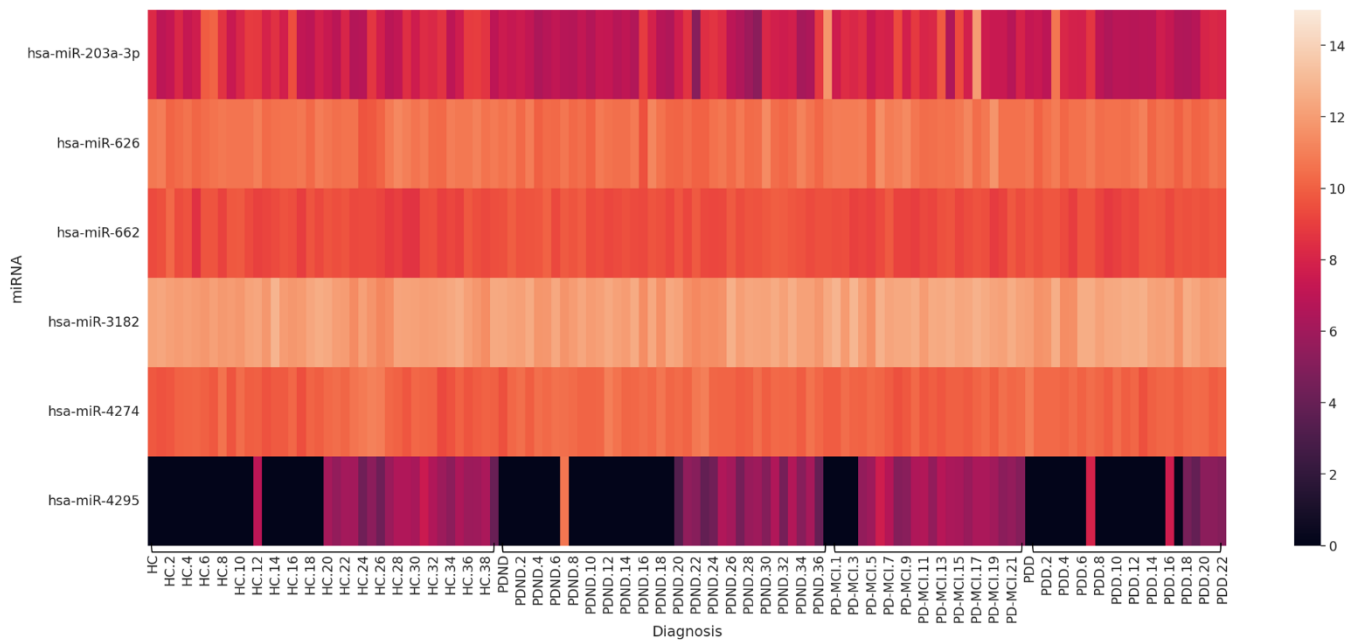

**Supplementary Figure 1.** The heat map plot of the 6 miRNA included all samples from the 4 study groups (HC, PDND, PD-MCI and PDD) in the discovery phase. The data was represented as Log2(reads). The y-axis indicated the 6 miRNA names; the x-axis indicated the diagnosis group of each sample. HC, healthy control; PDND, Parkinson’s disease with no dementia; PD-MCI, Parkinson’s disease with mild cognitive impairment; PDD, Parkinson’s disease with dementia.

Figure S2.

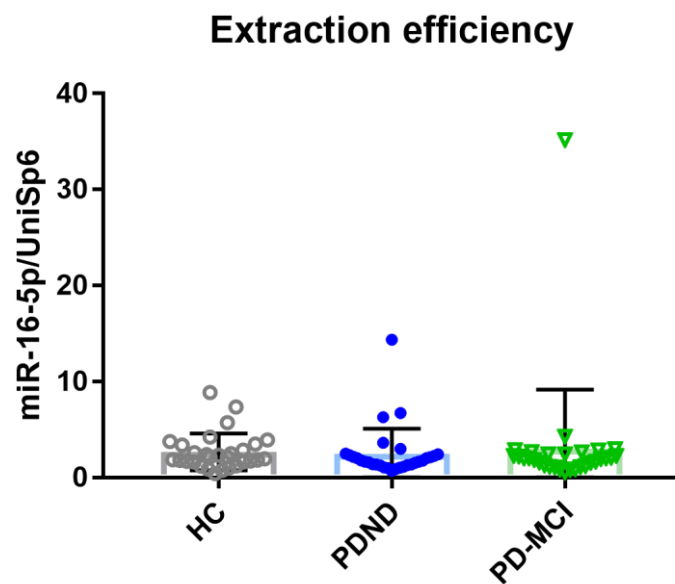

**Supplementary Figure 2.** The RNA extraction efficiency examination by the ratio of miR-16-5p/UniSp6. The external spike-in UniSp6 (0.5  $\mu$ l) was added to the lysis buffer before RNA extraction. The expression of miR-16-5p and UniSp6 were examined by ddPCR. The ratio of miR-16-5p/UniSp6 was analyzed using Kruskal-Wallis test followed by Dunn's multiple comparisons test (post-hoc test) among the groups of HC (n=29), PDND (n=30) and PD-MCI (n=30). Data are shown as Mean  $\pm$  SD. HC, healthy control; PDND, Parkinson's disease with no dementia; PD-MCI, Parkinson's disease with mild cognitive impairment; PDD, Parkinson's disease with dementia.

Figure S3.

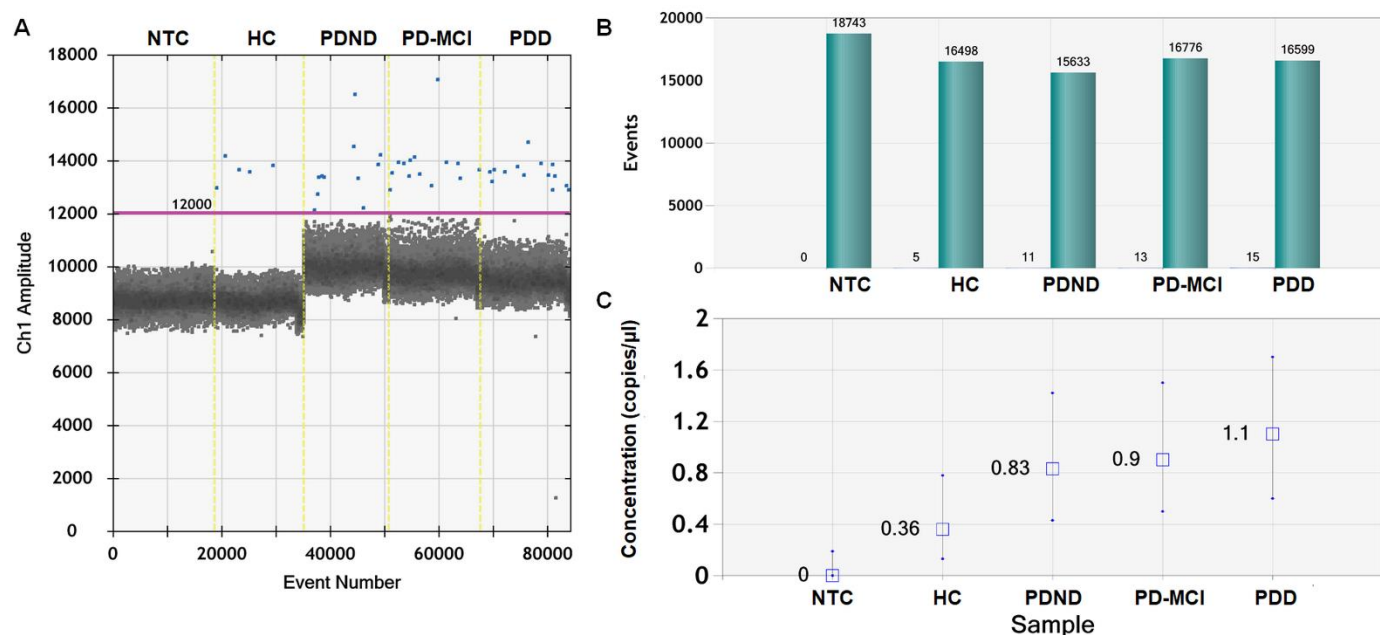

**Supplementary Figure 3.** The ddPCR examination of miR-203a-3p. **A–C.** Examples of ddPCR results (n=1 in each study group). **A.** The representative 1D amplitude plot shows the positive (blue) and negative (gray) droplets for examining miR-203a-3p. NTC, the non-template control (n=1), HC (n=1), PDND (n=1), PD-MCI (n=1) and PDD (n=1). The droplets above the amplitude threshold (pink horizontal line) were estimated as positive droplets, and the remaining detected droplets were classified as negative droplets. **B.** The estimated number of total (green bar; 18743, 16498, 15633, 16776 and 16599) and positive (blue bar; 0, 5, 11, 13 and 15) droplets for the examination of miR-203a-3p via ddPCR. Positive droplets with less than 3 droplets were considered negative results. NTC, the non-template control (n=1), HC (n=1), PDND (n=1), PD-MCI (n=1) and PDD (n=1). **C.** The expression level of miR-203a-3p converted to copies per microliter. NTC, the non-template control (n=1), HC (n=1), PDND (n=1), PD-MCI (n=1) and PDD (n=1). HC, healthy control; PDND, Parkinson's disease with no dementia; PD-MCI, Parkinson's disease with mild cognitive impairment; PDD, Parkinson's disease with dementia.

Figure S4.

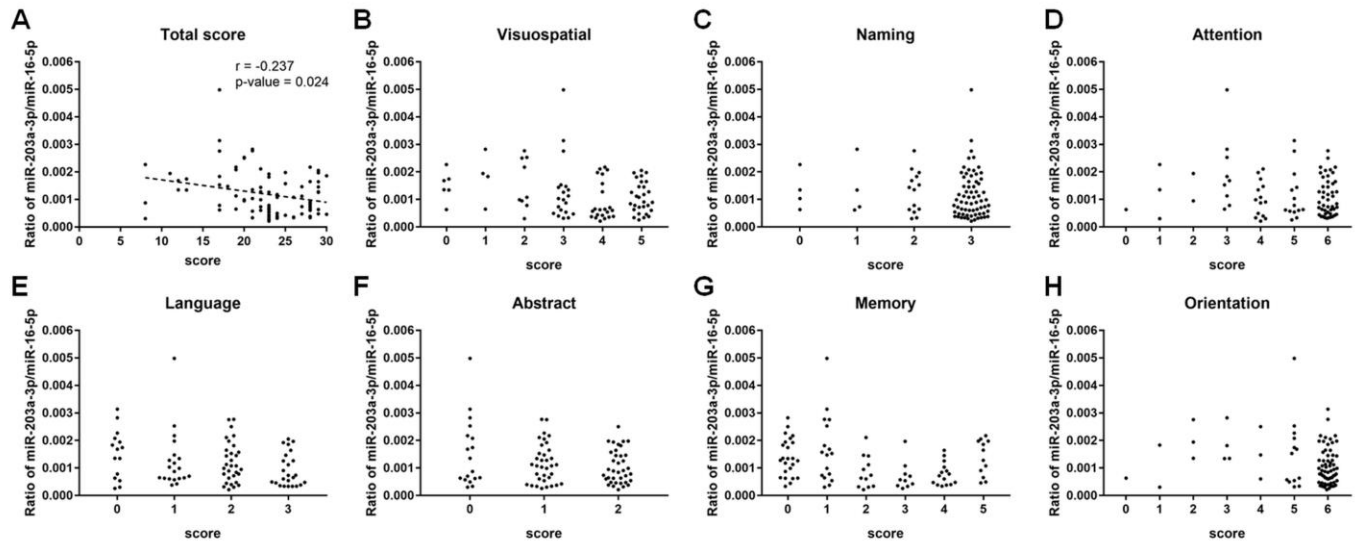

**Supplementary Figure 4.** The scatter plot of the ratio of miR-203a-3p/miR-16-5p versus cognitive domains used in correlation analysis was conducted by GraphPad Prism (version 7.04). **A-H.** The ratio of miR-203a-3p/miR-16-5p versus cognitive scores, including the total score and individual domain scores of MoCA were analyzed using a Spearman correlation analysis in all PD patients (n=90). **A.** The ratio of miR-203a-3p/miR-16-5p versus the total score of MoCA. **B.** The ratio of miR-203a-3p/miR-16-5p versus the score of visuospatial. **C.** The ratio of miR-203a-3p/miR-16-5p versus the score of naming. **D.** The ratio of miR-203a-3p/miR-16-5p versus the score of attention. **E.** The ratio of miR-203a-3p/miR-16-5p versus the score of language. **F.** The ratio of miR-203a-3p/miR-16-5p versus the score of abstract. **G.** The ratio of miR-203a-3p/miR-16-5p versus the score of memory. **H.** The ratio of miR-203a-3p/miR-16-5p versus the score of orientation.

Figure S5.

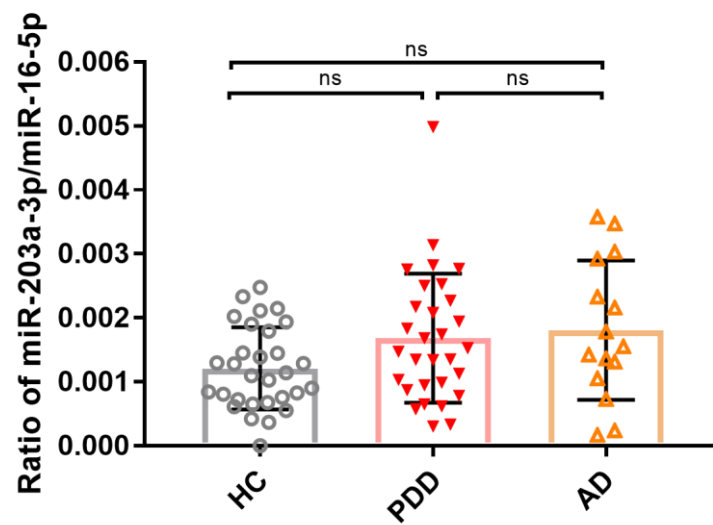

**Supplementary Figure 5.** The ddPCR examination of miR-203a-3p/miR-16-5p was analyzed by the Kruskal–Wallis test followed by Dunn's multiple comparisons test (post hoc test) among the study groups. ns, no significant difference. HC (n=30), PDD (n=30) and AD (n=15). Data are shown as the mean  $\pm$  SD. HC, healthy control; PDD, Parkinson's disease with dementia; AD, Alzheimer's disease.

Table S1.

**Supplementary Table 1.** The AUCs and 95% confidence intervals of specificity, sensitivity and accuracy for the ROC curve analysis for each comparison group using the ratio of miR-203a-3p/miR-16-5p alone.

| Comparison groups | AUC<br>(95% CI)           | Specificity<br>(95% CI)   | Sensitivity<br>(95% CI)   | Accuracy<br>(95% CI)      |
|-------------------|---------------------------|---------------------------|---------------------------|---------------------------|
| PD-MCI/PDD        | 0.7160<br>(0.4321-0.9506) | 0.5556<br>(0.2222-0.8889) | 1.0000<br>(1.0000-1.0000) | 0.7778<br>(0.6111-0.9444) |
| PD-MCI/PDND       | 0.5309<br>(0.2469-0.8025) | 0.8889<br>(0.6667-1.0000) | 0.4444<br>(0.1111-0.7778) | 0.6667<br>(0.4444-0.8333) |
| PDD/PDND          | 0.7407<br>(0.4815-0.9506) | 0.5556<br>(0.2222-0.8889) | 1.0000<br>(1.0000-1.0000) | 0.7778<br>(0.6111-0.9444) |
| PDD/HC            | 0.6420<br>(0.3333-0.9259) | 0.6667<br>(0.3333-1.0000) | 0.7778<br>(0.4444-1.0000) | 0.7222<br>(0.5000-0.8889) |
| PD-MCI/HC         | 0.6667<br>(0.3824-0.9136) | 0.8889<br>(0.6667-1.0000) | 0.5556<br>(0.2222-0.8889) | 0.7222<br>(0.5556-0.8889) |
| PDND/HC           | 0.7160<br>(0.4318-0.9383) | 0.8889<br>(0.6667-1.0000) | 0.6667<br>(0.3333-1.0000) | 0.7778<br>(0.6111-0.9444) |

The analyzed dataset was divided by 70% for model training and 5-fold cross validation, and the remaining 30% for model testing. HC, healthy control; PDND, Parkinson's disease with no dementia; PD-MCI, Parkinson's disease with mild cognitive impairment; PDD, Parkinson's disease with dementia; ROC curve, receiver operating characteristic curve; AUC, area under the ROC curve.

Table S2.

**Supplementary Table 2.** The multivariate logistic regression model for detecting PDD.

| <b>Covariate</b>      | <b>Coefficient</b> | <b>Estimated<br/>Standard Error</b> | <b>z value</b> | <b>p-value</b> |
|-----------------------|--------------------|-------------------------------------|----------------|----------------|
| Intercept             | -25.42314          | 8.42341                             | -3.018         | <0.01          |
| miR-203a-3p/miR-16-5p | 0.22671            | 0.08279                             | 2.738          | <0.01          |
| Age                   | 0.23692            | 0.09185                             | 2.579          | <0.01          |
| UPDRS_III             | 0.19145            | 0.05594                             | 3.422          | <0.001         |

The multivariate logistic regression model was developed consisting of the variables included the ratio of miR-203a-3p/miR16-5p, age and the part III of the Unified Parkinson's Disease Rating Scale (UPDRS III). The analyzed dataset, obtained from the 90 PD patients, was 70% for model training and 5-fold cross validation, and the remaining 30% for model testing.

Table S3.

**Supplementary Table 3.** The experimental-based predicted pathways and target genes of miR-203a-3p via KEGG database analysis.

| Pathway                                   | p-value  | Target genes                                                                                                                              |
|-------------------------------------------|----------|-------------------------------------------------------------------------------------------------------------------------------------------|
| Hepatitis B                               | 2.73E-09 | AKT2,BIRC5,CDK6,CREB1,CXCL8,E2F1,E2F3,IL6,JUN,MAPK8,MAPK9,MYD88,PIK3CA,PRKCA,SMAD4,SR,STAT1,TBK1,TNF                                      |
| Pathways in cancer                        | 5.04E-07 | ABL1,AKT2,BIRC5,CDH1,CDK6,CXCL8,E2F1,E2F3,EGLN1,FGF2,FZD2,GSK3B,IGF1R,IL6,JUN,MAPK8,MAPK9,MMP1,NCOA4,PIK3CA,PRKCA,SMAD2,SMAD4,STAT1,VEGFA |
| Pancreatic cancer                         | 3.68E-06 | AKT2,CDK6,E2F1,E2F3,MAPK8,MAPK9,PIK3CA,SMAD2,SMAD4,STAT1,VEGFA                                                                            |
| Chagas disease (American trypanosomiasis) | 2.75E-05 | AKT2,CALR,CXCL8,GNAS,IL6,JUN,MAPK8,MAPK9,MYD88,PIK3CA,SMAD2,TNF                                                                           |
| Ras signaling pathway                     | 3.09E-05 | ABL1,AKT2,EXOC2,FGF2,IGF1R,MAPK8,MAPK9,PIK3CA,PLD2,PRKACB,PRKCA,RAP1A,RASA2,RASAL2,RGL2,TBK1,VEGFA                                        |
| Influenza A                               | 4.16E-05 | AKT2,CXCL8,GSK3B,IL6,JUN,MAPK8,MAPK9,MYD88,PIK3CA,PRKCA,SOCS3,STAT1,TBK1,TNF                                                              |
| Toll-like receptor signaling pathway      | 4.16E-05 | AKT2,CXCL8,IL6,JUN,MAPK8,MAPK9,MYD88,PIK3CA,STAT1,TBK1,TNF                                                                                |
| Colorectal cancer                         | 6.55E-05 | AKT2,BIRC5,GSK3B,JUN,MAPK8,MAPK9,PIK3CA,SMAD2,SMAD4                                                                                       |
| MicroRNAs in cancer                       | 6.55E-05 | ABL1,ATM,BCL2L2,BMI1,CDK6,E2F1,E2F3,PIK3CA,PRKCA,TP63,TRIM71,VEGFA,ZEB1,ZEB2                                                              |
| Prolactin signaling pathway               | 9.75E-05 | AKT2,GSK3B,MAPK8,MAPK9,PIK3CA,SOCS3,SOCS6,SR,STAT1                                                                                        |
| Focal adhesion                            | 1.11E-04 | AKT2,CAV1,GSK3B,IGF1R,JUN,MAPK8,MAPK9,PIK3CA,PPP1CB,PRKCA,RAP1A,RAPGEF1,ROCK2,SR,VEGFA                                                    |
| HTLV-I infection                          | 1.23E-04 | AKT2,ATM,CALR,CREB1,E2F1,E2F3,FZD2,GSK3B,IL6,JUN,MAPK8,PIK3CA,PRKACB,RAN,SMAD2,SMAD4,TNF                                                  |
| Hepatitis C                               | 1.63E-04 | AKT2,CXCL8,GSK3B,IFIT1,MAPK8,MAPK9,PIK3CA,SOCS3,STAT1,TBK1,TNF                                                                            |
| Wnt signaling pathway                     | 2.27E-04 | CXXC4,FZD2,GSK3B,JUN,MAPK8,MAPK9,PRICKLE2,PRKACB,PRKCA,ROCK2,SMAD4,WIF1                                                                   |
| Dopaminergic synapse                      | 3.00E-04 | AKT2,CLOCK,CREB1,GNAS,GSK3B,KIF5B,MAPK8,MAPK9,PPP1CB,PRKACB,PRKCA                                                                         |
| FoxO signaling pathway                    | 3.56E-04 | AKT2,ATM,G6PC,IGF1R,IL6,MAPK8,MAPK9,PIK3CA,SMAD2,SMAD4,SOD2                                                                               |
| ErbB signaling pathway                    | 5.16E-04 | ABL1,AKT2,GSK3B,JUN,MAPK8,MAPK9,PIK3CA,PRKCA,SR                                                                                           |



|                                           |          |                                                                                             |
|-------------------------------------------|----------|---------------------------------------------------------------------------------------------|
| Melanoma                                  | 5.30E-04 | <i>AKT2,CDH1,CDK6,E2F1,E2F3,FGF2,IGF1R,PIK3CA</i>                                           |
| Herpes simplex infection                  | 6.53E-04 | <i>CLOCK,IFIT1,IL6,JUN,MAPK8,MAPK9,MYD88,PPP1CB,SOC<br/>S3,STAT1,TBK1,TNF</i>               |
| Bladder cancer                            | 8.25E-04 | <i>CDH1, CXCL8,E2F1,E2F3,MMP1,VEGFA</i>                                                     |
| Endocytosis                               | 8.64E-04 | <i>ASAP1,CAV1,CCR5,IGF1R,PARD6B,PIP5K1A,PLD2,RAB22A,<br/>RNF41,SH3GLB1,SMAD2,SMURF2,SRC</i> |
| Proteoglycans in cancer                   | 8.64E-04 | <i>AKT2,CAV1,FGF2,FZD2,IGF1R,PIK3CA,PPP1CB,PRKACB,PR<br/>KCA,ROCK2,SMAD2,SRC,TNF,VEGFA</i>  |
| Osteoclast differentiation                | 0.001    | <i>AKT2,CREB1,JUN,MAPK8,MAPK9,PIK3CA,SOCS3,STAT1,SY<br/>K,TNF</i>                           |
| TNF signaling pathway                     | 0.001    | <i>AKT2,CREB1,IL6,JUN,MAPK8,MAPK9,PIK3CA,SOCS3,TNF</i>                                      |
| Tuberculosis                              | 0.001    | <i>AKT2,CREB1,IL6,MAPK8,MAPK9,MYD88,NFYA,SRC,STAT1,<br/>SYK,TNF</i>                         |
| Adherens junction                         | 0.002    | <i>CDH1, IGF1R,SMAD2,SMAD4,SNAI1,SNAI2,SRC</i>                                              |
| Fc epsilon RI signaling pathway           | 0.002    | <i>AKT2, MAPK8,MAPK9,PIK3CA,PRKCA,SYK,TNF</i>                                               |
| Glioma                                    | 0.002    | <i>AKT2, CDK6,E2F1,E2F3,IGF1R,PIK3CA,PRKCA</i>                                              |
| GnRH signaling pathway                    | 0.002    | <i>GNAS,JUN,MAPK8,MAPK9,PLD2,PRKACB,PRKCA,SRC</i>                                           |
| Insulin signaling pathway                 | 0.002    | <i>AKT2,G6PC,GSK3B,MAPK8,MAPK9,PIK3CA,PPP1CB,PRKAC<br/>B,RAPGEF1,SOCS3</i>                  |
| Neurotrophin signaling pathway            | 0.002    | <i>ABL1,AKT2,GSK3B,JUN,MAPK8,MAPK9,PIK3CA,RAP1A,RA<br/>PGEF1</i>                            |
| Non-alcoholic fatty liver disease (NAFLD) | 0.002    | <i>AKT2,CXCL8,GSK3B,IL6,JUN,MAPK8,MAPK9,PIK3CA,SOCS<br/>3,TNF</i>                           |
| Pertussis                                 | 0.002    | <i>CXCL8, IL6,JUN,MAPK8,MAPK9,MYD88,TNF</i>                                                 |
| Rap1 signaling pathway                    | 0.002    | <i>AKT2,CDH1,FGF2,GNAS,IGF1R,PARD6B,PIK3CA,PRKCA,RA<br/>P1A,RAPGEF1,SRC,VEGFA</i>           |
| Renal cell carcinoma                      | 0.002    | <i>AKT2,EGLN1,JUN,PIK3CA,RAP1A,RAPGEF1,VEGFA</i>                                            |
| Chronic myeloid leukemia                  | 0.003    | <i>ABL1, AKT2,CDK6,E2F1,E2F3,PIK3CA,SMAD4</i>                                               |
| Non-small cell lung cancer                | 0.003    | <i>AKT2, CDK6,E2F1,E2F3,PIK3CA,PRKCA</i>                                                    |

|                                        |       |                                                                               |
|----------------------------------------|-------|-------------------------------------------------------------------------------|
| Amphetamine addiction                  | 0.004 | <i>CREB1, GNAS, JUN, PPP1CB, PRKACB, PRKCA</i>                                |
| HIF-1 signaling pathway                | 0.004 | <i>AKT2, EGLN1, IGF1R, IL6, LDHA, PIK3CA, PRKCA, VEGFA</i>                    |
| Hippo signaling pathway                | 0.004 | <i>BIRC5, BMPR1A, CDH1, FZD2, GSK3B, PARD6B, PPP1CB, SMAD2, SMAD4, SNAI2</i>  |
| Salmonella infection                   | 0.004 | <i>CXCL8, IL6, JUN, MAPK8, MAPK9, MYD88, ROCK2</i>                            |
| Shigellosis                            | 0.004 | <i>ABL1, CXCL8, MAPK8, MAPK9, ROCK2, SRC</i>                                  |
| TGF-beta signaling pathway             | 0.004 | <i>ACVR2B, BMPR1A, SMAD2, SMAD4, SMAD9, SMURF2, TNF</i>                       |
| Fc gamma R-mediated phagocytosis       | 0.005 | <i>AKT2, ASAP1, PIK3CA, PIP5K1A, PLD2, PRKCA, SYK</i>                         |
| Prostate cancer                        | 0.005 | <i>AKT2, CREB1, E2F1, E2F3, GSK3B, IGF1R, PIK3CA</i>                          |
| Toxoplasmosis                          | 0.005 | <i>AKT2, CCR5, MAPK8, MAPK9, MYD88, PIK3CA, STAT1, TNF</i>                    |
| Adipocytokine signaling pathway        | 0.006 | <i>AKT2, G6PC, MAPK8, MAPK9, SOCS3, TNF</i>                                   |
| Chemokine signaling pathway            | 0.006 | <i>AKT2, CCR5, CXCL8, GSK3B, PIK3CA, PRKACB, RAP1A, ROCK2, SRC, STAT1</i>     |
| Type II diabetes mellitus              | 0.006 | <i>MAPK8, MAPK9, PIK3CA, SOCS3, TNF</i>                                       |
| Measles                                | 0.007 | <i>AKT2, CDK6, GSK3B, IL6, MYD88, PIK3CA, STAT1, TBK1</i>                     |
| African trypanosomiasis                | 0.008 | <i>IL6, MYD88, PRKCA, TNF</i>                                                 |
| Cell cycle                             | 0.008 | <i>ABL1, ATM, CDK6, E2F1, E2F3, GSK3B, SMAD2, SMAD4</i>                       |
| Estrogen signaling pathway             | 0.008 | <i>AKT2, CREB1, GNAS, JUN, PIK3CA, PRKACB, SRC</i>                            |
| Jak-STAT signaling pathway             | 0.008 | <i>AKT2, IL24, IL6, IL7, LIFR, PIK3CA, SOCS3, STAT1</i>                       |
| Amoebiasis                             | 0.009 | <i>CXCL8, GNAS, IL6, PIK3CA, PRKACB, PRKCA, TNF</i>                           |
| Cytokine-cytokine receptor interaction | 0.009 | <i>ACVR2B, BMPR1A, CCR5, CXCL8, IL24, IL6, IL7, LIFR, TNF, TNFRSF9, VEGFA</i> |
| Pathogenic Escherichia coli infection  | 0.009 | <i>ABL1, CDH1, NCL, PRKCA, ROCK2</i>                                          |

|                                                            |       |                                                                             |
|------------------------------------------------------------|-------|-----------------------------------------------------------------------------|
| Epstein-Barr virus infection                               | 0.01  | <i>AKT2,GSK3B,JUN,MAPK8,MAPK9,PIK3CA,PRKACB,RAN,SYK,TBK1</i>                |
| MAPK signaling pathway                                     | 0.01  | <i>AKT2,DUSP5,FGF2,JUN,MAP3K13,MAPK8,MAPK9,PRKACB,PRKCA,RAP1A,RASA2,TNF</i> |
| NOD-like receptor signaling pathway                        | 0.01  | <i>CXCL8, IL6,MAPK8,MAPK9,TNF</i>                                           |
| Rheumatoid arthritis                                       | 0.01  | <i>CXCL8, IL6,JUN,MMP1,TNF,VEGFA</i>                                        |
| Apoptosis                                                  | 0.011 | <i>AKT2, ATM,MYD88,PIK3CA,PRKACB,TNF</i>                                    |
| Progesterone-mediated oocyte maturation                    | 0.011 | <i>AKT2, IGF1R,MAPK8,MAPK9,PIK3CA,PRKACB</i>                                |
| Inflammatory bowel disease (IBD)                           | 0.012 | <i>IL6, JUN,SMAD2,STAT1,TNF</i>                                             |
| RIG-I-like receptor signaling pathway                      | 0.012 | <i>CXCL8, MAPK8,MAPK9,TBK1,TNF</i>                                          |
| VEGF signaling pathway                                     | 0.012 | <i>AKT2, PIK3CA,PRKCA,SRC,VEGFA</i>                                         |
| mTOR signaling pathway                                     | 0.012 | <i>AKT2, PIK3CA,PRKCA,TNF,VEGFA</i>                                         |
| Thyroid hormone signaling pathway                          | 0.014 | <i>AKT2,GSK3B,PIK3CA,PRKACB,PRKCA,SRC,STAT1</i>                             |
| Malaria                                                    | 0.016 | <i>CXCL8, IL6,MYD88,TNF</i>                                                 |
| Cocaine addiction                                          | 0.017 | <i>CREB1, GNAS,JUN,PRKACB</i>                                               |
| Epithelial cell signaling in Helicobacter pylori infection | 0.017 | <i>CXCL8, JUN,MAPK8,MAPK9,SRC</i>                                           |
| PI3K-Akt signaling pathway                                 | 0.017 | <i>AKT2,CDK6,CREB1,FGF2,G6PC,GSK3B,IGF1R,IL6,IL7,PIK3CA,PRKCA,SYK,VEGFA</i> |
| Melanogenesis                                              | 0.022 | <i>CREB1, FZD2,GNAS,GSK3B,PRKACB,PRKCA</i>                                  |
| B cell receptor signaling pathway                          | 0.024 | <i>AKT2, GSK3B,JUN,PIK3CA,SYK</i>                                           |
| Serotonergic synapse                                       | 0.024 | <i>ALOX15,GABRB1,GNAS,HTR2A,PRKACB,PRKCA</i>                                |
| Cholinergic synapse                                        | 0.027 | <i>AKT2, CREB1,KCNJ2,PIK3CA,PRKACB,PRKCA</i>                                |
| T cell receptor signaling pathway                          | 0.027 | <i>AKT2, GSK3B,JUN,MAPK9,PIK3CA,TNF</i>                                     |

|                                         |       |                                                                |
|-----------------------------------------|-------|----------------------------------------------------------------|
| Adrenergic signaling in cardiomyocytes  | 0.03  | <i>AKT2, CREB1, GNAS, PIK3CA, PPP1CB, PRKACB, PRKCA</i>        |
| Vascular smooth muscle contraction      | 0.03  | <i>EDNRA, GNAS, PPP1CB, PRKACB, PRKCA, ROCK2</i>               |
| Vibrio cholerae infection               | 0.031 | <i>GNAS, PRKACB, PRKCA, TJP2</i>                               |
| Viral carcinogenesis                    | 0.031 | <i>CCR5, CDK6, CREB1, JUN, PIK3CA, PRKACB, RASA2, SRC, SYK</i> |
| Circadian rhythm                        | 0.033 | <i>CLOCK, CREB1, FBXL3</i>                                     |
| Endometrial cancer                      | 0.033 | <i>AKT2, CDH1, GSK3B, PIK3CA</i>                               |
| GABAergic synapse                       | 0.033 | <i>GABRB1, PRKACB, PRKCA, SLC12A5, SRC</i>                     |
| Transcriptional misregulation in cancer | 0.037 | <i>ATM, BMI1, CXCL8, IGF1R, IL6, RUNX2, SIX1, ZEB1</i>         |
| Legionellosis                           | 0.039 | <i>CXCL8, IL6, MYD88, TNF</i>                                  |
| Morphine addiction                      | 0.041 | <i>GABRB1, GNAS, PDE7A, PRKACB, PRKCA</i>                      |
| NF-kappa B signaling pathway            | 0.041 | <i>ATM, CXCL8, MYD88, SYK, TNF</i>                             |
| Prion diseases                          | 0.041 | <i>IL6, PRKACB, PRNP</i>                                       |
| Small cell lung cancer                  | 0.041 | <i>AKT2, CDK6, E2F1, E2F3, PIK3CA</i>                          |
| Gap junction                            | 0.042 | <i>GNAS, HTR2A, PRKACB, PRKCA, SRC</i>                         |
| Inositol phosphate metabolism           | 0.042 | <i>IPMK, PI4K2B, PIK3CA, PIP5K1A</i>                           |
| Tight junction                          | 0.042 | <i>AKT2, CASK, PARD6B, PRKCA, SRC, TJP2</i>                    |
| Antigen processing and presentation     | 0.046 | <i>CALR, CREB1, NFYA, TNF</i>                                  |
